# Supplementary material for: Towards the liquid phase exfoliation of bismuth iodide
Source: Royal Society of Chemistry journal article supplement (doi:10.1039/c7dt01749a), 2017-01-01
Supplement: c7dt01749a1.pdf [file c7dt01749a1.pdf]

Electronic Supplementary Information on

## Towards the Liquid Phase Exfoliation of Bismuth Iodide

N. Heidary,<sup>a</sup> A. Beyer<sup>b</sup>, K. Volz<sup>b</sup> and J. Heine<sup>\*a</sup>

<sup>a</sup> Department of Chemistry and Material Sciences Center, Philipps-Universität Marburg, Hans-Meerwein-Straße, 35043 Marburg, Germany.

<sup>b</sup> Department of Physics and Material Sciences Center, Philipps-Universität Marburg, Hans-Meerwein-Straße, 35043 Marburg, Germany.

### Experimental details

#### General

Unless otherwise indicated, all steps were performed under inert conditions using a Schlenk line, glove box and pre-dried glassware. Solvents were obtained from commercial sources and dried by standing over activated 3 Å (alcohols) or 4 Å (aromatic solvents) mole sieve (about 10-20 Vol-%) for 12 h and subsequent distillation onto another portion of activated mole sieve.

BiI<sub>3</sub> was prepared from stoichiometric amounts of the elements at 180°C. The raw material was recrystallized under solvothermal conditions from aqueous hydriodic acid (20 w-%) at 160°C, washed with water, ethanol and diethyl ether and stored under inert conditions afterwards. This treatment removes traces of unreacted starting material and BiOI.

#### Powder Diffraction

Measurements were performed on a *STADI MP (STOE Darmstadt)* powder diffractometer in transmission geometry, with CuKα<sub>1</sub> radiation (λ= 1.54056 Å) at room temperature.

#### Exfoliation method

25 mg of BiI<sub>3</sub> were sonicated with 8 mL of the respective solvent for 60 min. The resulting suspension was centrifuged for 90 min at 500 rpm and the supernatant used for all further measurements. Ethanol and isopropanol were tested both dried and used as received, but toluene and chlorobenzene were only used dried.

It is noteworthy that the literature procedures that the use of “wet” solvent aimed to replicate did not include a centrifugation step.<sup>1</sup>

### **Spectroscopic Characterization**

The optical absorption in the range of 800-200 nm of the solutions/suspensions obtained during exfoliation were measured using a *Varian Cary 5000* UV/Vis/NIR spectrometer.

Solid BiI<sub>3</sub> powder was measured on the same spectrometer using a Praying Mantis accessory (Harrick). To allow for an easier comparison with data obtained from measurements in solution/suspension, raw data was transformed from %Reflectance R to Absorbance A according to  $A = \log (1/R)$ .<sup>2</sup>

### **TEM Investigations**

The BiI<sub>3</sub> suspension in chlorobenzene was drop-cast onto carbon TEM grids. The samples were dried under vacuum and kept under Argon atmosphere afterwards.

The samples were transferred into the TEM minimizing the duration of exposure to ambient air. High angle annular dark field (HAADF) images were acquired in a double C<sub>s</sub> corrected JEOL JEM 2200FS operating at 200 kV. Supplementary transmission electron diffraction patterns were acquired in a JEOL JEM 3010 operating at 300 kV.

## Additional Figures

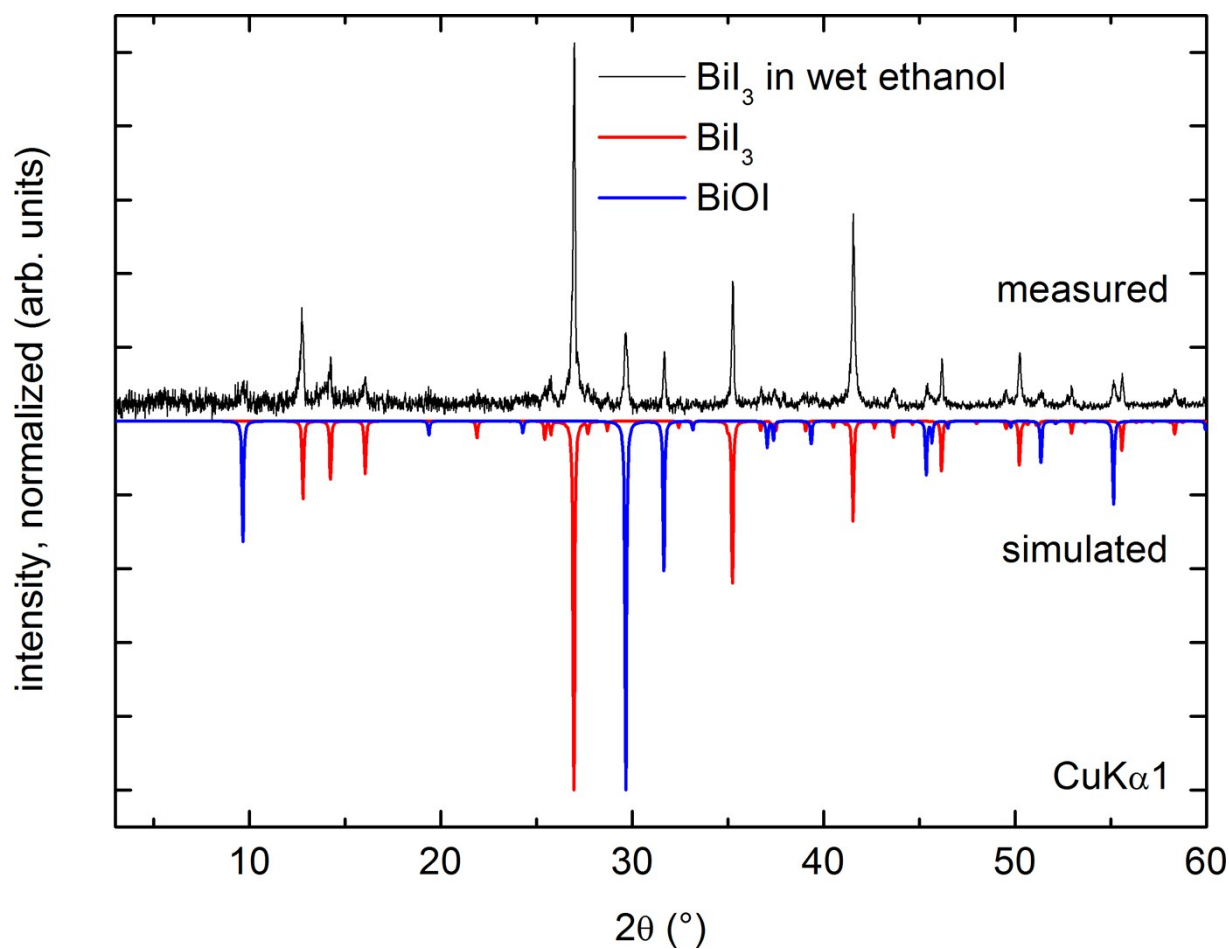

**Figure S1.** Powder diffractogram of a BiI<sub>3</sub> sample suspended in ethanol under aerobic conditions showing the formation of significant amounts of the hydrolysis product BiOI.

## References

- 1 (a) H. Li and J. Jiao, *Chem. Mater.*, 2008, **20**, 3770; (b) H. Li, J. M. Green and J. Jiao, *J. Phys. Chem. C*, 2008, **112**, 15140; (c) K. Moorthy Boopathi, S. Raman, R. Mohanraman, F.-C. Chou, Y.-Y. Chen, C.-H. Lee, F.-C. Chang and C.-W. Chu, *Sol. Energ. Mat. Sol. Cells*, 2014, **121**, 35.
- 2 S. I. Boldish and W. B. White, *Am. Mineral.*, 1998, **83**, 865.
